# Supplementary material
Source: publisher site journal article supplement (https://www.degruyter.com/publication/journal_key/IASL/downloadAsset/IASL_Hinweise%20zur%20Manuskripteinrichtung.pdf)
Supplement: Supplementary file 1 [file IASL_Hinweise%20zur%20Manuskripteinrichtung.pdf]

# IASL

## Hinweise zur Einrichtung des Manuskripts (Stand: Juni 2016)

Die VerfasserInnen von Aufsätzen und Forschungsberichten erhalten ein Exemplar des jeweiligen Heftes sowie eine PDF-Datei ihres Beitrags (zusätzlich besteht die Möglichkeit einer elektronischen und dem Autor zugänglichen Bereitstellung des Beitrags auf einer Plattform des Verlags). Ein Honorar kann nicht gezahlt werden. Alle eingehenden Manuskripte werden durch die Herausgeber begutachtet. Die BeiträgerInnen werden gebeten, ihre Manuskripte entsprechend den folgenden Richtlinien zu gestalten:

### 1. Allgemeines zur Manuskript-Gestaltung

- Bitte reichen Sie Ihr **Manuskript** so ein, dass sich Ihre spätere Fahnenkorrektur auf das Ausbessern von Druckfehlern beschränkt.
- Bitte verfassen Sie Ihren Beitrag nach den Regeln der neusten deutschen Rechtschreibung (2006, Duden ab Aufl. 24).
- Bitte verwenden Sie **2-zeiligen Abstand** für den gesamten Text einschließlich der Anmerkungen, Titellisten u.ä. und nummerieren Sie die Manuskriptseiten durch.
- **Absätze** werden jeweils durch eine Leerzeile angezeigt.
- Es darf grundsätzlich **keine manuelle Silbentrennung** vorgenommen werden.
- Bitte achten Sie darauf, **korrekte typographische Anführungszeichen** zu verwenden. Akzeptabel sind im Deutschen „Gänsefüßchen“ oder aber auch »Möwchen«. Bei einfachen Anführungszeichen sollte auf jeden Fall die Form ‚96‘ beachtet werden. **Achtung:** Alte Word-Versionen formatieren einfache Anführungszeichen standardmäßig ‚falsch‘ – also mit 99.
- Bitte verwenden Sie für **Hervorhebungen im Text** ausschließlich **Kursivierungen**, z.B. für *Werktitel* oder *fremdsprachliche Begriffe*. Bei längeren Beiträgen empfehlen sich **Zwischenüberschriften** (kursiv, arabische Gliederungsziffern: 1., 1.1., usw.) oder abschnittsweise Nummerierung zur Kennzeichnung der *Gliederung*, die dem Beitrag vorangestellt werden kann. Konventionelle **Siglen** und **Abkürzungen** sind wegen des interdisziplinären Charakters möglichst zu vermeiden (beziehungsweise aufzulösen, siehe 3.). Im laufenden Text geht guter Stil vor Abkürzungen. Autorvornamen sind zumindest bei der ersten Nennung auf jeden Fall auszuschreiben.
- Sollten Sie in Ihrem Beitrag **Abbildungen** verwenden, machen Sie bitte im Text deutlich, wo diese platziert werden müssen und verfassen Sie eine entsprechende Bildunterschrift mit Angabe der Quelle. Liefern Sie die Abbildungen separat als Dateien in den Formaten JPG (unkomprimiert, maximale Qualität) oder TIFF. Die Abbildungen sollten in der Abdruckgröße eine Auflösung von mindestens 300 dpi aufweisen. (Dies entspricht bei einer Abbildung mit der Breite des Satzspiegels mindestens 1350 Pixel.) Strichzeichnungen oder Abbildungen, die Schrift enthalten, sollten in einer Auflösung von 1200 dpi eingereicht werden.
- IASL stellt jedem Aufsatz ein **Abstract** in englischer Sprache voran. Bitte verfassen Sie ein *Abstract* Ihres Beitrages (ca. 2 Sätze, maximal 6 Zeilen), wenn möglich in englischer Sprache.

## 2. Kennzeichnung von Zitaten

Alle Zitate müssen nach Buchstaben und Zeichensetzung genau mit dem Original übereinstimmen. Zusätze des Verfassers werden in eckigen Klammern markiert, **Auslassungen** sind durch Punkte in eckigen Klammern [...] zu kennzeichnen. Erläuterungen des Autors werden mit den nachfolgenden gekennzeichnet: [gemeint ist hier Hegel; N.N.]

- **Kürzere Zitate** werden in doppelte Anführungszeichen gesetzt. Zitat im Zitat erscheint dann in einfachen Anführungszeichen.
- **Längere Zitate** (mehr als drei Manuskriptzeilen) werden im Text eingerückt, petit gesetzt und ohne Anführungszeichen wiedergegeben.
- **Buchtitel im fortlaufenden Text** werden durch Kursivierung wiedergegeben. Dies gilt auch für Fußnoten, sofern der Titel nicht Teil einer vollständigen bibliographischen Angabe ist. In diesem Fall wird er nicht kursiv gesetzt.
- Möglichst präzise ist zwischen **eigentlichem Zitieren** (doppelte Anführungszeichen), **uneigentlichem Zitieren**, z.B. eines Forschungsbegriffes (einfache Anführungszeichen), und der **Wiedergabe alter Sprachstufen** bzw. fremdsprachiger Fachbegriffe (kursiv gedruckt) zu unterscheiden.

## 3. Formatierung von Fußnoten/Anmerkungen

- Hinter jedes Zitat ist für den Stellennachweis eine **Fußnotenziffer** zu setzen. Fußnoten werden für den gesamten Text durchlaufend nummeriert und in mindestens Schriftgröße 10 sowie 2-zeiligem Abstand formatiert. Der Hinweis auf Fußnoten und Anmerkungen erfolgt im Text durch hochgestellte Ziffer **immer nach dem Satzzeichen**,<sup>1</sup> es sei denn, die Anmerkung bezieht sich auf ein einzelnes Wort<sup>2</sup> im Satz.

<sup>1</sup> Dies ist eine Musterfußnote: Die *Gesellschaftlichen Erzählungen* wurden von Johann August Unzer herausgegeben und erschienen in 4 Bänden in Hamburg 1753 und 1754. Die *Sammlung* wurde von J.F. Ravenstein herausgegeben und erschien in Zweibrücken und Straßburg 1755.

- Wo laufend aus einem Text zitiert wird, kann dies ggf. auch im Fließtext unter einer Sigle geschehen. Es muss jedoch in der Anmerkung des Quellennachweises darauf hingewiesen werden:

<sup>9</sup> Gabriel Ruhumbika: *Village in Uhuru*. London: Longman 1969. Zitate daraus werden im Text mit der Sigle VU und Seitenangabe nachgewiesen.

- **Stellennachweisklammern** stehen immer vor dem Satzzeichen: „[...] Sein Gesicht war hell und offen, die Augen übergroß“ (KKAS, S. 38). Bei längeren Zitaten im petit-Satz steht die Stellennachweisklammer hingegen *nach* dem Satzzeichen:

[...] „Kurze Tage, kurze Tage“, sagte er zu sich, glitt vom Schlitten und ging dem Wirtshaus zu. (KKAS, S. 31)

#### 4.1. Bibliographische Angaben

- **Verlagsangaben** stets mit Orts- und Verlagsnamen. Bei mehr als drei Verlagsorten ist nur der erste auszuschreiben und das Kürzel u.a. anzufügen: Gerard Delanty/Engin F. Isin (Hg.): Handbook of Historical Sociology. London u.a.: Sage 2003.
- Bei **mehr als drei Herausgebern** sollten nur die alphabetisch erste Person ausgeschrieben und für die anderen das Kürzel u.a. angefügt werden. In begründeten Fällen können jedoch auch alle Herausgeber ausgeschrieben werden: Harald Fricke u.a. (Hg.): Reallexikon der deutschen Literaturwissenschaft. Berlin 1997–2003, Bd. 1. Berlin: De Gruyter 2007.

- **Selbständige Veröffentlichungen:**

Niklas Luhmann: Die Gesellschaft der Gesellschaft, Bd. 2. Frankfurt/M.: Suhrkamp 1997, S. 57, 64ff., 105.

Horst Renz/Friedrich Wilhelm Graf (Hg.): Umstrittene Moderne. Die Zukunft der Neuzeit im Urteil der Epoche Ernst Troeltschs. Gütersloh: Mohn 1987.

Peter V. Zima: Literarische Ästhetik. Methoden und Modelle der Literaturwissenschaft. Tübingen/Basel: Francke <sup>2</sup>1995, S. 15–19, 23ff.

- Veröffentlichungen in einem **Sammelband:**

Gerhard Neumann: „Rede, damit ich dich sehe“. Das neuzeitliche Ich und der physiognomische Blick. In: Ulrich Fülleborn/Manfred Engel (Hg.): Das neuzeitliche Ich in der Literatur des 18. und 20. Jahrhunderts. Zur Dialektik der Moderne. Ein internationales Symposium. München: Fink 1988, S. 71–107, hier S. 87f.

Sollte es das Titelblatt verlangen, kann der Titel auch voran- und der Herausgebername nachgestellt werden:

Stadt und Bibliothek. Literaturversorgung als kommunale Aufgabe im Kaiserreich und in der Weimarer Republik. Hg. von Jörg Fligge und Alois Klotzbücher. [Ort ...]

- Veröffentlichung im **Sammelband desselben Autors:**

Uwe Wirth: Der Performanzbegriff im Spannungsfeld von Illokution, Iteration und Indexikalität. In: U.W. (Hg.): Performanz. Zwischen Sprachphilosophie und Kulturwissenschaften. Frankfurt/M.: Suhrkamp, S. 9–61, hier S. 32.

- **Mehrere Aufsätze aus einer Publikation:** Sollten in Ihrem Beitrag mehrere Aufsätze aus dem gleichen Sammelband o.Ä. nachgewiesen werden, so müssen die einzelnen Beiträge bei der ersten Nennung jeweils mit kompletten bibliographischen Angaben gelistet werden. Ein Verweis auf eine frühere Fußnote reicht hier nicht aus.

- Veröffentlichungen in einem wissenschaftlichen **Periodikum:**

Niels Werber: Technologien der Macht. System- und medientheoretische Überlegungen zu Schillers Dramatik. In: Jahrbuch der deutschen Schillergesellschaft 40 (1996), S. 210–243, hier S. 239ff.

Dirk von Petersdorff: Die Öffnung des ästhetischen Feldes. In: Internationales Archiv für Sozialgeschichte der deutschen Literatur (IASL) 34/2 (2009), S. 228–234, hier 230f.

- Wissenschaftliche **Editionen**:

Johann Wolfgang Goethe: Stella (Erste Fassung). In: J.W.G.: Sämtliche Werke. Hg. von Friedmar Apel u.a. Frankfurt/M. 1985ff. I. Abt., Bd. 4: Dramen 1765–1775. Unter Mitarbeit von Peter Huber hg. von Dieter Borchmeyer. Frankfurt/M.: Deutscher Klassiker Verlag 1985, S. 531–574, hier S. 543.

- **Lexikonartikel**:

Jochen Hörisch: Nietzsche, Friedrich (Wilhelm). In: Walter Killy (Hg.): Literatur Lexikon. Autoren und Werke deutscher Sprache. Gütersloh/München: Bertelsmann 1988–1993. Bd. 8. Gütersloh/München 1990, S. 414–420.

- Artikel in **Zeitungen** und ähnlich oft erscheinenden Periodika:

Akademische Bonifazius-Correspondenz 25. Jg., Nr. 5 vom 1. Juli 1910.

- Veröffentlichungen aus dem **Internet**:

Georg Mein: Kultur als Mehrwert. Überlegungen zum methodologischen Potential kulturwissenschaftlicher Theoreme für die literaturwissenschaftliche Analyse. In: IASLonline: [http://iasl.uni-muenchen.de/rezensio/liste/Mein3825227650\\_1711.html](http://iasl.uni-muenchen.de/rezensio/liste/Mein3825227650_1711.html) (zuletzt eingesehen am 29.05.2007).

#### 4.2. **Kurzform bibliographischer Angaben**

- Es wird darum gebeten, auf die Verweisung »a.a.O.«, »ebd.« und ähnliche zu verzichten. Treten Titelangaben in den Fußnoten wiederholt auf, erfolgt ihre Angabe in **Kurzform**, wobei auf die Anmerkung verwiesen wird, die den genauen bibliographischen Vermerk enthält.

Werber: Technologien der Macht (Anm. 25), S. 239.

#### 4.3. **Bibliographische Angaben in Forschungsberichten und Forschungsdokumentationen**

- Abweichend von der bisher genannten Zitierweise werden bei Forschungsberichten und Forschungsdokumentationen die im Beitrag besprochenen Titel in den Fußnoten mit **Kurztitel** angegeben:

Wirth: Der Performanzbegriff, S. 162.

- Ausführlich erscheinen sie in einer ***alphabetisch geordneten Bibliographie*** am Schluss des Fortschrittsberichts bzw. der Forschungsdokumentation, worauf der Beiträger in der ersten Fußnote des Beitrages hinweist. Die Zitierweise entspricht der in 4.1. aufgezeigten, mit dem Unterschied, dass die Nachnamen zuerst aufgelistet werden:

Werber, Niels: Technologien der Macht. System- und medientheoretische Überlegungen zu Schillers Dramatik. In: Jahrbuch der deutschen Schillergesellschaft 40 (1996), S. 210–243, hier S. 239ff.
